# Supplementary material for: Perspectives of deprived patients on diabetes self-management programmes delivered by the local primary care team: a qualitative study on facilitators and barriers for participation, in France
Source: Springer Nature journal article supplement (doi:10.1186/s12913-020-05715-3), 2020-09-11
Supplement: MOESM1 [file 12913_2020_5715_MOESM1_ESM.pdf]

| <b>Additional file 1.</b> Consolidated criteria for reporting qualitative research (COREQ): 32-item checklist |                                                                                                                                                                                                                                                                                                         |
|---------------------------------------------------------------------------------------------------------------|---------------------------------------------------------------------------------------------------------------------------------------------------------------------------------------------------------------------------------------------------------------------------------------------------------|
| <b>Item</b>                                                                                                   | <b>Guide questions/description</b>                                                                                                                                                                                                                                                                      |
| <b>Domain 1: Research team and reflexivity</b>                                                                |                                                                                                                                                                                                                                                                                                         |
| <i>Personal characteristics</i>                                                                               |                                                                                                                                                                                                                                                                                                         |
| 1. Interviewer/facilitator                                                                                    | Interviews were conducted by one of the authors ( H. Lucas)                                                                                                                                                                                                                                             |
| 2. Credentials                                                                                                | H. Lucas, resident doctor in family medicine                                                                                                                                                                                                                                                            |
| 3. Occupation                                                                                                 | At the time of the study, H. Lucas was a resident in family medicine, University of Rennes 1                                                                                                                                                                                                            |
| 4. Gender                                                                                                     | H. Lucas is a woman                                                                                                                                                                                                                                                                                     |
| 5. Experience and training                                                                                    | H. Lucas is a doctor in family medicine. She followed a course by a senior researcher, expert in qualitative research, during her residency                                                                                                                                                             |
| <i>Relationship with participants</i>                                                                         |                                                                                                                                                                                                                                                                                                         |
| 6. Relationship established                                                                                   | Participants were unknown to the researcher before the research start                                                                                                                                                                                                                                   |
| 7. Participants' knowledge of the interviewer                                                                 | Participants were informed about the study prior to the interviews through a phone call by the interviewer. To increase the participants' recruitment rate and to make them feel comfortable, they could choose the interview place (home or practice).                                                 |
| 8. Interviewer's characteristics                                                                              | The interviewer introduced herself as a student without specifying her medical background, in order not to be perceived as a family doctor, a status that could make participants uncomfortable                                                                                                         |
| <b>Domain 2: Study design</b>                                                                                 |                                                                                                                                                                                                                                                                                                         |
| <i>Theoretical framework</i>                                                                                  |                                                                                                                                                                                                                                                                                                         |
| 9. Methodological orientation and theory                                                                      | Researchers used the reflexive thematic analysis as theoretical background.                                                                                                                                                                                                                             |
| <i>Participants' selection</i>                                                                                |                                                                                                                                                                                                                                                                                                         |
| 10. Sampling                                                                                                  | Participants were recruited from all people who attended the DSME programme                                                                                                                                                                                                                             |
| 11. Method of approach                                                                                        | Participants were invited by phone, using the contact information they gave. An appointment time was planned for the interview, in the case of positive answer. If the participant was unavailable, a voice message was left in the answering machine, if possible (two attempts for each participant). |
| 12. Sample size                                                                                               | 19                                                                                                                                                                                                                                                                                                      |
| 13. Non-participation                                                                                         | 27 participants were initially approached. The reasons for non-participation were: being abroad (n=2), refusal to be recorded (n=1), registered but finally did not attend the                                                                                                                          |

|                                    |                                                                                                                                                                                                                                                         |
|------------------------------------|---------------------------------------------------------------------------------------------------------------------------------------------------------------------------------------------------------------------------------------------------------|
|                                    | DSME programme (n=2), and could not be reached (n=3).                                                                                                                                                                                                   |
| <i>Setting</i>                     |                                                                                                                                                                                                                                                         |
| 14. Setting of data collection     | To make the participants comfortable, they were interviewed either at home or at the primary care practice, according to their choice                                                                                                                   |
| 15. Presence of non-participants   | Only the interviewer and the participant were present at the interview                                                                                                                                                                                  |
| 16. Description of sample          | The study samples were patients with T2DM who went to a structured and validated DSME programme at the primary care practice in 2017.                                                                                                                   |
| <i>Data collection</i>             |                                                                                                                                                                                                                                                         |
| 17. Interview guide                | The interview guide was developed based on a literature review performed at the beginning of the study and after discussion with a DSME expert and all co-authors. The final version was pilot tested with patients from another primary care practice. |
| 18. Repeat interviews              | No repeat interview was planned or carried out.                                                                                                                                                                                                         |
| 19. Audio/visual recording         | All interviews were digitally recorded and transcribed by the interviewer.                                                                                                                                                                              |
| 20. Field notes                    | Field notes were made throughout the interviews.                                                                                                                                                                                                        |
| 21. Duration                       | The average interview duration was 31 minutes, with a maximum of 44 and a minimum of 21 minutes.                                                                                                                                                        |
| 22. Data saturation                | In reflexive thematic analysis, the saturation is not an issue to discuss.                                                                                                                                                                              |
| 23. Transcripts returned           | Transcripts were not returned to the participants                                                                                                                                                                                                       |
| Domain 3: Analysis and findings    |                                                                                                                                                                                                                                                         |
| <i>Data analysis</i>               |                                                                                                                                                                                                                                                         |
| 24. Number of data coders          | E. Allory (associated professor at the Family Medicine Department of Rennes University, expert in qualitative research) and the interviewer did the coding.                                                                                             |
| 25. Description of the coding tree | Authors met regularly to discuss interviews, coding and themes.                                                                                                                                                                                         |
| 26. Derivation of themes           | Themes were partly identified from the literature and partly derived from the interview data.                                                                                                                                                           |
| 27. Software                       | No software was used. The analysis was done manually.                                                                                                                                                                                                   |
| 28. Participant checking           | Participants were not invited to check the analysis                                                                                                                                                                                                     |
| <i>Reporting</i>                   |                                                                                                                                                                                                                                                         |
| 29. Quotations presented           | Quotations from participants were used and assigned individual numeric codes to respect the interviewees' anonymity (e.g.,: P1, P6...)                                                                                                                  |
| 30. Data and findings consistent   | There was consistency between data and findings.                                                                                                                                                                                                        |
| 31. Clarity of major themes        | Major themes were generated, presented, and illustrated with quotes                                                                                                                                                                                     |

|                             |                                                                    |
|-----------------------------|--------------------------------------------------------------------|
| 32. Clarity of minor themes | Minor themes were analysed, but not presented due to lack of space |
|-----------------------------|--------------------------------------------------------------------|
