# Supplementary material for: Perspectives of deprived patients on diabetes self-management programmes delivered by the local primary care team: a qualitative study on facilitators and barriers for participation, in France
Source: Springer Nature journal article supplement (doi:10.1186/s12913-020-05715-3), 2020-09-11
Supplement: MOESM2 [file 12913_2020_5715_MOESM2_ESM.pdf]

**Additional file 2.** Details of the diabetes self-management programme at the primary care practice

|                                     |                                                                                                                                                                                                                                                                                                                                                                                                                                                                                         |                                                                                           |
|-------------------------------------|-----------------------------------------------------------------------------------------------------------------------------------------------------------------------------------------------------------------------------------------------------------------------------------------------------------------------------------------------------------------------------------------------------------------------------------------------------------------------------------------|-------------------------------------------------------------------------------------------|
| Programme providers                 | Two family physicians<br>One chiropodist<br>Two nurses<br>One pharmacist<br>One laboratory technician                                                                                                                                                                                                                                                                                                                                                                                   | One dentist<br>Two physiotherapists<br>Two expert participants<br>One medical coordinator |
| Programme modalities                | Eight weekly workshops of 90 minutes, led by two different healthcare providers of the team. Each participant had an individual conversation with a team member before the beginning and after the programme end, to fix the participation objective(s).                                                                                                                                                                                                                                |                                                                                           |
| Self-management programme content   | <ol style="list-style-type: none"> <li>1) Analysis of diabetes representation among participants</li> <li>2) Pharmacological treatments for diabetes</li> <li>3) Self-management of foot care</li> <li>4) Balanced diet</li> <li>5) Importance of the carbohydrates in the diet</li> <li>6) Place of physical activity in daily life</li> <li>7) Eye care for people with diabetes</li> <li>8) Supplies and equipment, such as needles and injectors, for diabetes treatment</li> </ol> |                                                                                           |
| Self-management programme promotion | <ol style="list-style-type: none"> <li>1) By the healthcare providers during consultations</li> <li>2) With posters in the primary care practice</li> </ol>                                                                                                                                                                                                                                                                                                                             |                                                                                           |
